# Supplementary material
Source: publisher site journal article supplement (https://www.dovepress.com/article/374871)
Supplement: Supplementary file 1 [file get_supplementary_file.php]

**Table S1** The FASTQ output from tape stripping showed the mean number of raw reads of healthy control, normal skin and lesional skin of patients with psoriasis before and after NUVB treatment.

| Group | raw reads | | filtered reads | |
| --- | --- | --- | --- | --- |
| mean | sd | mean | sd |
| Tape control | 54,044.33 | 10,446.73 | 39,249.33 | 7,546.81 |
| Tape lesion after | 47,702.11 | 15,081.33 | 39,147.89 | 15,103.66 |
| Tape lesion before | 54,548.14 | 21,007.81 | 46,039.43 | 20,714.25 |
| Tape normal after | 115,165.22 | 204,333.39 | 86,682.00 | 154,158.36 |
| Tape normal before | 89,185.79 | 156,614.47 | 67,755.21 | 117,677.75 |

**Table S2** The FASTQ output from skin biopsy showed the mean number of raw reads of healthy control, normal skin and lesional skin of patients with psoriasis before and after NUVB treatment.

| Group | raw reads | | filtered reads | |
| --- | --- | --- | --- | --- |
| mean | sd | mean | sd |
| Biopsy lesion after | 72,734.50 | 15,968.01 | 68,237.83 | 16,990.58 |
| Biopsy lesion before | 79,126.27 | 16,952.26 | 75,695.55 | 16,242.44 |
| Biopsy normal after | 76,362.60 | 11,613.31 | 71,795.40 | 11,302.70 |
| Biopsy normal before | 86,665.73 | 40,165.59 | 83,587.00 | 39,443.80 |


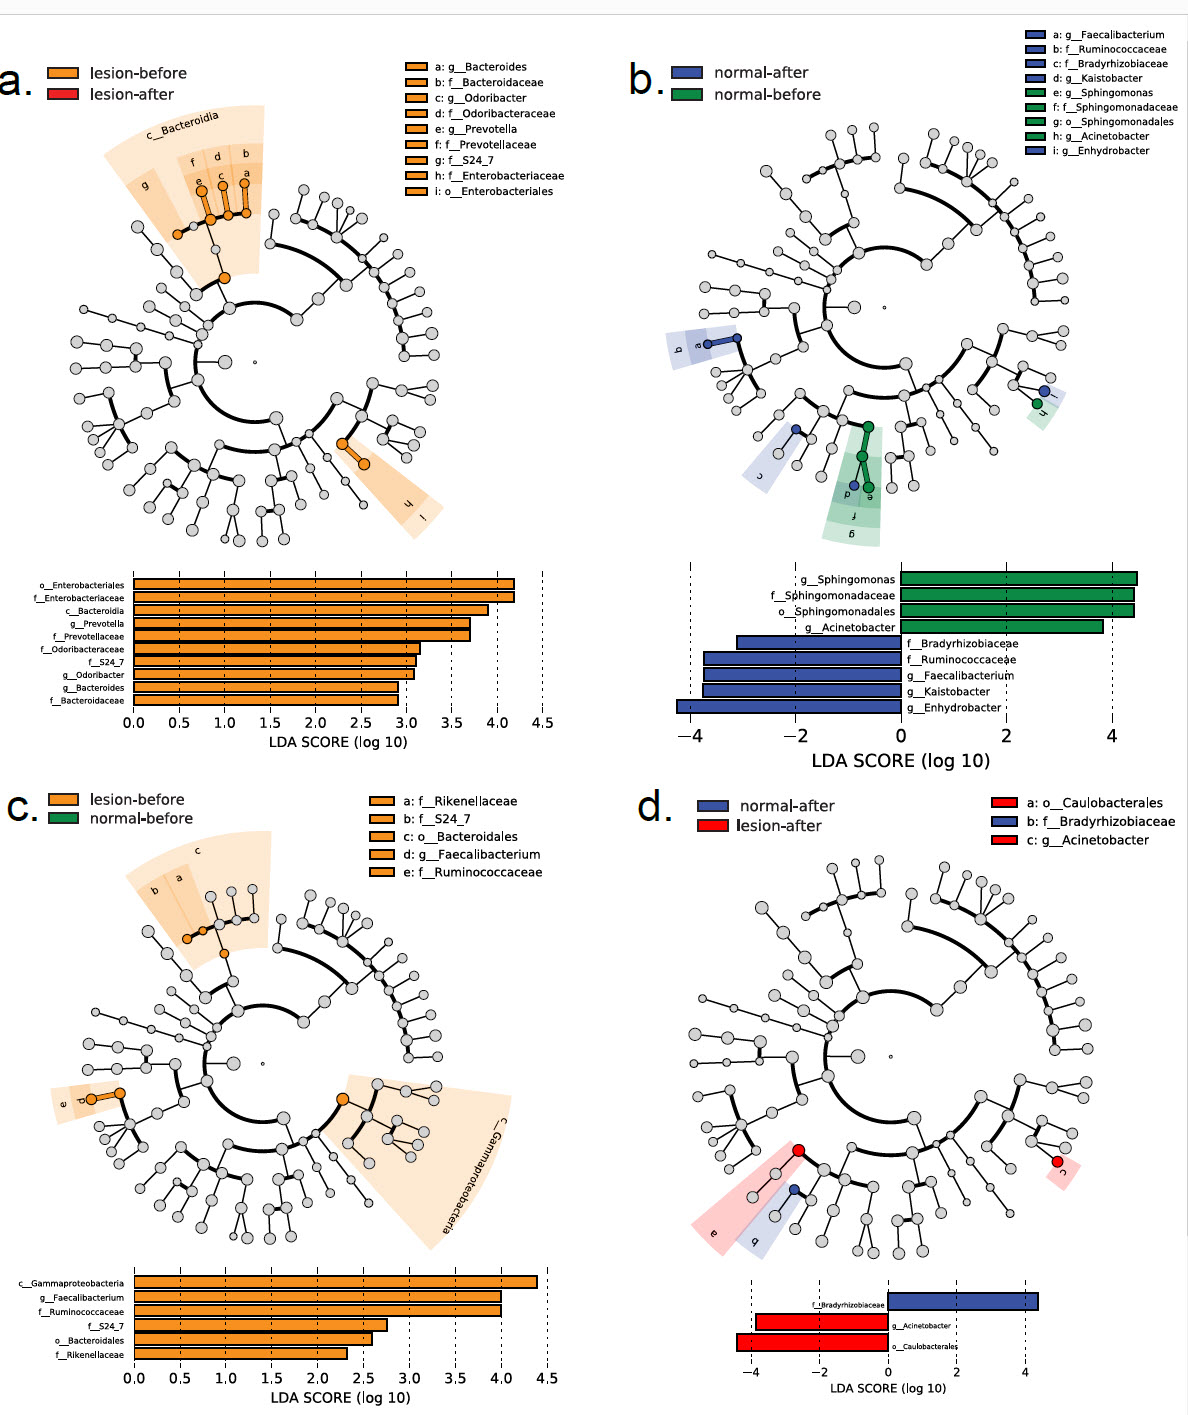


**Figure S1.** Plot of LEfSe analysis from skin biopsy indicating enriched bacterial classes among patients with psoriasis before and after NUVB treatment. Cladogram showing the differences in relative abundance. The length of the bar column represents the Linear Discriminant Analysis (LDA) score **(a)** between psoriasis lesional skin before (orange) and after NUVB treatment (red) **(b)** between psoriasis normal skin before (green) and after NUVB treatment (blue), **(c)** between psoriasis lesional skin before (orange) and psoriasis normal skin before treatment (green), and **(d)** between psoriasis normal skin (blue) and psoriasis lesional skin NUVB (red). (*p*< 0.05; LDA score 2.5).

**Table S3.** Relative abundance of microbiota from skin biopsy and tape stripping **(a)** phylum relative abundance from skin biopsy **(b)** genus relative abundance from skin biopsy **(c)** phylum relative abundance from tape stripping **(d)** genus relative abundancefrom tape stripping.

**(a)** phylum relative abundance from skin biopsy

| **Phylum** | **BLA** | | **BLB** | | **BNA** | | **BNB** | |
| --- | --- | --- | --- | --- | --- | --- | --- | --- |
| **Mean** | **SD** | **Mean** | **SD** | **Mean** | **SD** | **Mean** | **SD** |
| Proteobacteria | 50.41267 | 18.75491 | 58.76238 | 11.34309 | 61.9289 | 9.598046 | 53.68404 | 9.026283 |
| Actinobacteria | 16.24235 | 13.44271 | 12.11967 | 7.287763 | 11.47801 | 6.607536 | 15.23577 | 12.54272 |
| Bacteroidetes | 14.27552 | 6.175031 | 16.48328 | 6.925551 | 22.01637 | 8.033659 | 21.29845 | 7.07019 |
| Firmicutes | 13.12328 | 13.91184 | 12.04492 | 10.79045 | 4.481037 | 2.901429 | 9.144556 | 7.905291 |
| Cyanobacteria | 5.533065 | 13.35349 | 0.546846 | 1.224307 | 0.056709 | 0.069379 | 0.482321 | 0.885869 |
| Chloroflexi | 0.404676 | 0.99125 | 0.008218 | 0.018336 | 0.025366 | 0.042441 | 0.128768 | 0.265944 |
| Deferribacteres | 0.00844 | 0.013402 | 0.034678 | 0.051635 | 0.013605 | 0.018973 | 0.026092 | 0.046985 |

**(b)** genus relative abundancefrom skin biopsy

| **Genus** | **BNB** | | **BNA** | | **BLB** | | **BLA** | |
| --- | --- | --- | --- | --- | --- | --- | --- | --- |
| **mean** | **SD** | **mean** | **SD** | **mean** | **SD** | **mean** | **SD** |
| *Sediminibacterium* | 18.98328 | 7.354567 | 21.79308 | 8.05613 | 13.81861 | 6.219823 | 13.38477 | 6.623507 |
| order Rhizobiales | 13.93725 | 7.440009 | 20.42506 | 5.727237 | 14.59049 | 7.951405 | 11.73091 | 9.642848 |
| *Corynebacterium* | 6.622855 | 5.031859 | 5.201848 | 6.244568 | 6.387907 | 4.957195 | 11.01667 | 13.59304 |
| *Staphylococcus* | 5.895609 | 6.865708 | 2.932963 | 3.199936 | 3.957373 | 6.257517 | 10.84296 | 13.56023 |
| *Paracoccus* | 2.462582 | 3.16426 | 7.312234 | 10.42692 | 5.538214 | 5.548306 | 7.848414 | 4.391211 |
| *Sphingomonas* | 5.813009 | 5.684644 | 0.243657 | 0.531537 | 6.491308 | 6.812125 | 2.789492 | 3.565498 |
| *Bradyrhizobium* | 3.123998 | 3.488059 | 4.21199 | 4.247882 | 4.809476 | 4.044993 | 3.485553 | 2.531939 |
| *Stenotrophomonas* | 2.375307 | 2.670813 | 4.714129 | 5.420829 | 4.26467 | 4.50211 | 2.424039 | 2.581793 |
| *Enhydrobacter* | 1.471074 | 2.478886 | 4.97328 | 2.551115 | 4.367406 | 6.702742 | 3.299662 | 5.922084 |
| *Achromobacter* | 5.278064 | 6.338804 | 4.235567 | 4.665348 | 1.224489 | 1.929127 | 1.284901 | 1.998059 |
| family Comamonadaceae | 4.843786 | 4.860589 | 2.157606 | 2.127036 | 1.995863 | 2.224961 | 1.889922 | 1.845995 |
| *Delftia* | 1.305543 | 2.407869 | 4.904374 | 5.682038 | 2.337274 | 3.345886 | 2.943473 | 4.740067 |
| *Pseudomonas* | 2.37818 | 2.433833 | 1.309951 | 0.863601 | 2.317232 | 4.144848 | 1.31253 | 1.959058 |
| *family Caulobacteraceae* | 1.676266 | 2.089723 | 0.515341 | 1.038816 | 2.487411 | 2.49234 | 2.5786 | 2.667343 |
| *Propionibacterium* | 4.157387 | 10.54882 | 0.498962 | 0.421169 | 0.749559 | 0.848382 | 0.494252 | 0.658533 |
| others | 19.67581 | 8.62605 | 14.56995 | 9.499669 | 24.66271 | 8.852638 | 22.67387 | 19.8122 |

BNB- biopsy from psoriasis non-lesional skin before NUVB, BNA- biopsy from psoriasis non-lesional skin after NUVB, BLB- biopsy from psoriasis lesional skin before NUVB, BLA- biopsy from psoriasis lesional skin after NUVB.

**(c)** phylum relative abundance from tape stripping

| **Phylum** | **TC (n=9)** | **TNB (n=14)** | **TNA (n=9)** | **TLB (n=14)** | **TLA (n=9)** | ***p*-value** |
| --- | --- | --- | --- | --- | --- | --- |
| Actinobacteria | 38.27 ± 20.95 | 49.15 ± 16.08 | 46.11 ± 13.57 | 43.83 ± 18.79 | 41.16 ± 21.3 | 0.674 |
| Proteobacteria | 45.66 ± 24.32 | 35.15 ± 14.69 | 35.89 ± 11.98 | 34.63 ± 17.65 | 37.51 ± 17.11 | 0.614 |
| Firmicutes | 7.14 ± 5.57 | 8.73 ± 5.94 | 10.67 ± 7.2 | 13.64 ± 13.24 | 10.29 ± 10.04 | 0.508 |
| Bacteroidetes | 6.32 ± 6.32 | 4.79 ± 4.2 | 4.69 ± 2.24 | 5.16 ± 4.84 | 6.99 ± 4.5 | 0.751 |
| Cyanobacteria | 1.39 ± 1.37 | 0.35 ± 0.25 | 0.95 ± 1.25 | 0.9 ± 1.71 | 2.54 ± 5.93 | 0.411 |
| others | 1.23 ± 1.09 | 1.83 ± 2.15 | 1.69 ± 1.17 | 1.84 ± 2 | 1.53 ± 0.98 | 0.914 |

*ANOVA test. *p-value <0.05 by the Bonferroni post-hoc test*

**(d)** genus relative abundancefrom tape stripping.

| **Bacterial taxa** | **TC (n=9)** | **TNB (n=14)** | **TNA (n=9)** | **TLB (n=14)** | **TLA (n=9)** | **p-value** |
| --- | --- | --- | --- | --- | --- | --- |
| *Corynebacterium* | 18.84 ± 15.55 | 27.96 ± 16.15 | 21.63 ± 11.22 | 25.16 ± 13.56 | 18.83 ± 11.24 | 0.446 |
| *Paracoccus* | 6.65 ± 6.69 | 9.01 ± 9.73 | 6.82 ± 5.27 | 6.23 ± 6.28 | 4.91 ± 2.95 | 0.701 |
| *Kocuria* | 1.47 ± 1.37 | 4.95 ± 6.56 | 9.81 ± 15.69 | 4.31 ± 6.95 | 11.45 ± 18.08 | 0.255 |
| *Enhydrobacter* | 5.2 ± 3.85 | 5.5 ± 7.05 | 6.94 ± 5.51 | 6.12 ± 6.54 | 6.61 ± 7.37 | 0.971 |
| *Micrococcus* | 4 ± 5.4 | 7.34 ± 7.95 | 4.45 ± 3.78 | 5.33 ± 5.79 | 3.51 ± 2.73 | 0.524 |
| family Caulobacteraceae | 3.72 ± 3.17 | 3.39 ± 2.92 | 3.36 ± 2.93 | 4.81 ± 5.96 | 5.01 ± 5.82 | 0.844 |
| *Staphylococcus* | 0.87 ± 1 | 3.2 ± 2.86 | 1.95 ± 3.46 | 6.73 ± 13.13 | 1.39 ± 1.37 | 0.264 |
| *Sediminibacterium* | 2.98 ± 3.4 | 1.95 ± 1.82 | 1.83 ± 1.34 | 2.11 ± 2.52 | 3.27 ± 3.99 | 0.680 |
| *Propionibacterium* | 6.38 ± 9.57b,c,d,e | 0.63 ± 0.71b | 2.14 ± 3.65c | 1.58 ± 4.31d | 0.4 ± 0.53e | 0.048* |
| family Neisseriaceae | 2.3 ± 3.72 | 2.36 ± 5.31 | 2.12 ± 3.87 | 2.18 ± 3.49 | 2.12 ± 4.56 | 1.000 |
| *Pseudomonas* | 6.17 ± 13.83 | 0.9 ± 0.67 | 1.18 ± 1.18 | 0.76 ± 0.71 | 1.54 ± 1.67 | 0.187 |
| *Acinetobacter* | 1.86 ± 1.85 | 2.48 ± 4.74 | 1.87 ± 1.5 | 2.27 ± 3.5 | 1.33 ± 1.51 | 0.933 |
| *Bradyrhizobium* | 1.78 ± 1.83 | 1.68 ± 1.87 | 1.28 ± 1.02 | 1.6 ± 1.64 | 3.11 ± 4.63 | 0.529 |
| *Prevotella* | 1.63 ± 3.18 | 1.76 ± 3.59 | 0.81 ± 0.88 | 1.94 ± 3.44 | 1.2 ± 1.87 | 0.907 |
| *Brevibacterium* | 1.18 ± 1.14 | 1.07 ± 0.87 | 1.15 ± 0.81 | 1.9 ± 2.5 | 2.11 ± 1.34 | 0.386 |
| *Anaerococcus* | 1.26 ± 1.45 | 1.38 ± 3.19 | 1.21 ± 2.78 | 0.9 ± 1.31 | 0.9 ± 2.21 | 0.981 |
| *Veillonella* | 0.75 ± 1.15 | 0.69 ± 1.58 | 2.16 ± 3.09 | 0.85 ± 1.54 | 1.57 ± 1.8 | 0.341 |
| *Finegoldia* | 1.13 ± 1.02 | 0.92 ± 0.81 | 1.12 ± 1.14 | 1.41 ± 1.63 | 0.88 ± 0.76 | 0.798 |
| *Agrobacterium* | 0.88 ± 0.59 | 0.71 ± 0.7 | 0.87 ± 0.92 | 0.89 ± 0.58 | 2.17 ± 3.49 | 0.225 |
| order Streptophyta | 1.37 ± 1.37 | 0.28 ± 0.25 | 0.68 ± 1.1 | 0.87 ± 1.61 | 2.54 ± 5.93 | 0.351 |
| order Rhizobiales | 2.1 ± 3.24 | 0.73 ± 0.66 | 0.63 ± 0.65 | 0.79 ± 0.75 | 0.93 ± 0.91 | 0.183 |
| *Sphingomonas* | 0.63 ± 0.44 | 0.96 ± 0.62 | 1.16 ± 1.34 | 1.08 ± 1.27 | 0.87 ± 0.87 | 0.803 |
| *Streptococcus* | 0.86 ± 1.03 | 0.69 ± 0.66 | 0.88 ± 0.6 | 0.71 ± 0.57 | 1.89 ± 2.97 | 0.269 |
| *Peptoniphilus* | 1.03 ± 1.14 | 0.48 ± 0.71 | 0.81 ± 1.7 | 1.04 ± 1.36 | 1.02 ± 2.4 | 0.849 |
| *Deinococcus* | 0.31 ± 0.8 | 1.1 ± 2.08 | 0.71 ± 0.88 | 0.88 ± 1.85 | 0.48 ± 0.53 | 0.748 |
| *Gordonia* | 0.41 ± 0.56 | 0.97 ± 1.79 | 0.92 ± 0.96 | 0.59 ± 1.13 | 0.8 ± 0.92 | 0.812 |
| *Janibacter* | 0.8 ± 1.11 | 1.05 ± 2.1 | 0.74 ± 1 | 0.54 ± 0.74 | 0.47 ± 0.69 | 0.826 |
| *Mycobacterium* | 0.98 ± 1.23 | 0.65 ± 0.49 | 1.18 ± 1.2 | 0.45 ± 0.54 | 0.5 ± 0.6 | 0.217 |
| *Phyllobacterium* | 0.55 ± 0.54 | 0.51 ± 0.73 | 0.7 ± 1.04 | 0.63 ± 1.41 | 0.91 ± 1.04 | 0.913 |
| *Chryseobacterium* | 0.43 ± 0.65 | 0.47 ± 0.29 | 0.8 ± 1.02 | 0.5 ± 0.84 | 0.77 ± 0.92 | 0.699 |
| *Ralstonia* | 0.94 ± 1.91 | 0.34 ± 0.42 | 0.67 ± 0.77 | 0.44 ± 0.43 | 0.64 ± 0.6 | 0.589 |
| *Brachybacterium* | 0.45 ± 0.75 | 0.51 ± 0.43 | 0.84 ± 0.95 | 0.48 ± 0.88 | 0.6 ± 0.61 | 0.772 |

*ANOVA test. * p-value <0.05 by the Bonferroni post-hoc test*

TC-tape stripping from healthy control, TNB-tape stripping from psoriasis non-lesional skin before NUVB, TNA- tape stripping from psoriasis non-lesional skin after NUVB, TLB- tape stripping from psoriasis lesional skin before NUVB, TLA- tape stripping from psoriasis lesional skin after NUVB.
